# Supplementary material for: p38 MAPK activation and H3K4 trimethylation is decreased by lactate in vitro and high intensity resistance training in human skeletal muscle
Source: PLoS One. 2017 May 3;12(5):e0176609. doi: 10.1371/journal.pone.0176609 (PMC5414990; doi:10.1371/journal.pone.0176609)
Supplement: S1 Table — (A) Mean percentages ± S.D. of C2C12 cells positive for the differentiation markers Pax7, Myf5, myogenin, and MHC. (B-E) P-values for the comparison of treatment groups (0 mM, 0 mM + DMSO, 0 mM + SB203580, 20 mM) for Pax 7 (B), Myf 5 (C), myogenin (D), and MHC (E). (XLS) [file pone.0176609.s001.xls]

## Sheet: InVitro
A
[%] positive cells	0 mM	0 mM + DMSO	0 mM + SB203580	20 mM
Pax7	3.84 ± 0.81	4.69 ± 0.86	11.35 ± 1.20	9.57 ± 0.89
Myf5	0.77 ± 0.23	0.79 ± 0.21	3.74 ± 0.43	5.89 ± 2.21
Myogenin	29.79 ± 0.82	32.48 ± 0.60	17.96 ± 1.48	18.62 ± 1.91
MHC	35.43 ± 2.55	32.20 ± 1.73	22.58 ± 0.95	19.22 ± 2.00
B
Pax7 - p-values	0 mM	0 mM + DMSO	0 mM + SB203580	20 mM
0 mM		-	p < 0.001	0.001
0 mM + DMSO	-		p < 0.001	0.005
0 mM + SB203580	p < 0.001	p < 0.001		-
20 mM	0.001	0.005	-
C
Myf5 - p-values	0 mM	0 mM + DMSO	0 mM + SB203580	20 mM
0 mM		-	p < 0.001	0.046
0 mM + DMSO	-		p < 0.001	0.047
0 mM + SB203580	p < 0.001	p < 0.001		-
20 mM	0.046	0.047	-
D
Myogenin - p-values	0 mM	0 mM + DMSO	0 mM + SB203580	20 mM
0 mM		-	0.019	0.035
0 mM + DMSO	-		p < 0.001	p < 0.001
0 mM + SB203580	0.019	p < 0.001		-
20 mM	0.035	p < 0.001	-
E
MHC - p-values	0 mM	0 mM + DMSO	0 mM + SB203580	20 mM
0 mM		-	p < 0.001	p < 0.001
0 mM + DMSO	-		0.006	p < 0.001
0 mM + SB203580	p < 0.001	0.006		-
20 mM	p < 0.001	p < 0.001	-
